# Supplementary material
Source: PubMed Central journal article supplement (PMC3072047)
Supplement: NIHMS251171-supplement-Supp_Table_S1___S8.pdf [file NIHMS251171-supplement-Supp_Table_S1___S8.pdf]

**SI Table 1. List of representative *M. tuberculosis* genes involved in central and lipid metabolism.**

| <b>Pathways</b>                                 | <b>Gene</b>   | <b>Rv #</b>    | <b>Product</b>                              |
|-------------------------------------------------|---------------|----------------|---------------------------------------------|
| <b>Glycolysis</b>                               | <i>ppgK</i>   | <i>Rv2702</i>  | glucokinase                                 |
|                                                 | <i>pfkA</i>   | <i>Rv3010c</i> | phosphofructokinase                         |
|                                                 | <i>pfkB</i>   | <i>Rv2029c</i> | phosphofructokinase                         |
|                                                 | <i>gap</i>    | <i>Rv1436</i>  | glyceraldehyde 3-P dehydrogenase            |
|                                                 | <i>pykA</i>   | <i>Rv1617</i>  | pyruvate kinase                             |
|                                                 | <i>lpdC</i>   | <i>Rv0462</i>  | E3 subunit of pyruvate dehydrogenase        |
|                                                 | <i>dlaT</i>   | <i>Rv2215</i>  | E2 subunit of pyruvate dehydrogenase        |
| <b>PPP</b>                                      | <i>devB</i>   | <i>Rv1445c</i> | 6-phosphogluconolactonase                   |
|                                                 | <i>zwf1</i>   | <i>Rv1121</i>  | glucose 6-P 1-dehydrogenase                 |
|                                                 | <i>zwf2</i>   | <i>Rv1447c</i> | glucose 6-P 1-dehydrogenase                 |
|                                                 | <i>tkt</i>    | <i>Rv1449c</i> | transketolase                               |
| <b>Fatty acid <math>\beta</math>-oxidation</b>  | <i>fadE5</i>  | <i>Rv0244c</i> | acyl-CoA dehydrogenase                      |
|                                                 | <i>fadE23</i> | <i>Rv3140</i>  | acyl-CoA dehydrogenase                      |
|                                                 | <i>fadA4</i>  | <i>Rv1323</i>  | acyl-CoA acetyltransferase                  |
|                                                 | <i>fadB</i>   | <i>Rv0860</i>  | fatty acid oxidation protein                |
| <b>TCA cycle</b>                                | <i>citA</i>   | <i>Rv0889c</i> | citrate synthase II                         |
|                                                 | <i>gltA2</i>  | <i>Rv0896</i>  | citrate synthase I                          |
|                                                 | <i>acn</i>    | <i>Rv1475c</i> | aconitase                                   |
|                                                 | <i>icd1</i>   | <i>Rv3339c</i> | isocitrate dehydrogenase                    |
|                                                 | <i>icd2</i>   | <i>Rv0066c</i> | isocitrate dehydrogenase                    |
|                                                 | <i>kgd</i>    | <i>Rv1248c</i> | $\alpha$ -ketoglutarate decarboxylase       |
|                                                 | <i>sdhA</i>   | <i>Rv3318</i>  | flavoprotein of succinate dehydrogenase     |
|                                                 | <i>sdhC</i>   | <i>Rv3316</i>  | cytochrome B-556 of succinate dehydrogenase |
|                                                 | <i>mdh</i>    | <i>Rv1240</i>  | malate dehydrogenase                        |
| <b>Glyoxylate shunt and methylcitrate cycle</b> | <i>icl</i>    | <i>Rv0467</i>  | isocitrate lyase                            |
|                                                 | <i>glcB</i>   | <i>Rv1837c</i> | malate synthase                             |
|                                                 | <i>prpC</i>   | <i>Rv1131</i>  | methylcitrate synthase                      |
| <b>Gluconeogenesis</b>                          | <i>mez</i>    | <i>Rv2332</i>  | malic enzyme                                |
|                                                 | <i>pckA</i>   | <i>Rv0211</i>  | phosphoenolpyruvate carboxykinase           |
|                                                 | <i>glpX</i>   | <i>Rv1099c</i> | fructose 1,6-bisphosphatase                 |
| <b>Glutamate synthesis</b>                      | <i>gltB</i>   | <i>Rv3859c</i> | glutamate synthase (large subunit)          |
|                                                 | <i>glnA1</i>  | <i>Rv2220</i>  | glutamine synthetase                        |
|                                                 | <i>gdh</i>    | <i>Rv2476c</i> | glutamate dehydrogenase                     |

SI Table 1 (continued)

| Pathways                                    | Gene           | Rv #           | Product                                   |
|---------------------------------------------|----------------|----------------|-------------------------------------------|
| <b>TAG synthesis</b>                        | <i>plsB2</i>   | <i>Rv2482c</i> | glycerol 3-P acyltransferase              |
|                                             | <i>Rv2182c</i> | <i>Rv2182c</i> | 1-acylglycerol 3-P O-acyltransferase      |
|                                             | <i>tgs1</i>    | <i>Rv3130c</i> | triacylglycerol synthase                  |
|                                             | <i>Rv3734c</i> | <i>Rv3734c</i> | triacylglycerol synthase                  |
|                                             | <i>Rv3371</i>  | <i>Rv3371</i>  | triacylglycerol synthase                  |
| <b>Mycolic acid synthesis</b>               | <i>fas</i>     | <i>Rv2524c</i> | fatty acid synthase                       |
|                                             | <i>fabH</i>    | <i>Rv0533c</i> | $\beta$ -ketoacyl-AcpM synthase III       |
|                                             | <i>kasA</i>    | <i>Rv2245</i>  | $\beta$ -ketoacyl-AcpM synthase           |
|                                             | <i>fabG1</i>   | <i>Rv1483</i>  | $\beta$ -ketoacyl-AcpM reductase          |
| <b>Multimethyl-branched lipid synthesis</b> | <i>accD5</i>   | <i>Rv3280</i>  | propionyl-CoA carboxylase $\beta$ chain 5 |
|                                             | <i>mas</i>     | <i>Rv2940c</i> | mycocerosic acid synthase                 |
|                                             | <i>fadD26</i>  | <i>Rv2930</i>  | fatty-acid-CoA ligase                     |
|                                             | <i>fadD28</i>  | <i>Rv2941</i>  | fatty-acid-CoA synthetase                 |
|                                             | <i>papA5</i>   | <i>Rv2939</i>  | conserved polyketide synthase             |
|                                             | <i>pks2</i>    | <i>Rv3825c</i> | polyketide synthase                       |

**SI Table 2. Normalized copy number of *M. tuberculosis* transcripts encoding enzymes involved in central metabolism and lipid metabolism in infected mouse lungs.**

| Pathways                                       | Days of infection |             |             |             |             |             |             |
|------------------------------------------------|-------------------|-------------|-------------|-------------|-------------|-------------|-------------|
|                                                | 12                | 15          | 18          | 21          | 30          | 50          | 100         |
| <b>Glycolysis</b>                              |                   |             |             |             |             |             |             |
| <i>ppgK (rv2702)</i>                           | 9.05384E-06       | 7.68374E-06 | 7.42879E-06 | 7.68859E-06 | 3.25553E-06 | 2.92922E-06 | 2.18645E-06 |
|                                                | 2.26932E-06       | 1.46707E-06 | 1.80539E-06 | 1.2114E-06  | 1.20631E-06 | 2.36274E-06 | 7.44899E-07 |
| <i>pfkA (rv3010c)</i>                          | 4.10322E-05       | 2.62999E-05 | 2.24073E-05 | 1.44781E-05 | 1.5874E-05  | 6.44185E-06 | 8.25625E-06 |
|                                                | 5.73168E-06       | 8.43619E-06 | 3.63535E-06 | 5.49592E-06 | 3.29631E-06 | 7.08969E-07 | 1.30734E-06 |
| <i>pfkB (rv2029c)</i>                          | 1.13033E-06       | 6.36083E-06 | 7.30358E-05 | 4.29272E-05 | 6.71498E-05 | 2.37429E-05 | 3.64158E-05 |
|                                                | 8.29191E-07       | 7.03403E-07 | 3.64377E-05 | 2.28433E-05 | 1.63369E-05 | 1.74753E-05 | 2.65626E-05 |
| <i>gap (rv1436)</i>                            | 1.53579E-05       | 1.2745E-05  | 9.98871E-06 | 6.15353E-06 | 1.06437E-06 | 1.85227E-06 | 2.02134E-06 |
|                                                | 4.3241E-06        | 1.90284E-06 | 2.24729E-06 | 6.33624E-06 | 8.51671E-07 | 8.36269E-07 | 1.63998E-06 |
| <i>pykA (rv1617)</i>                           | 1.3645E-05        | 7.63762E-06 | 9.34367E-06 | 6.48558E-06 | 2.24008E-06 | 3.25764E-06 | 3.67734E-06 |
|                                                | 2.91594E-06       | 5.60469E-07 | 1.28319E-06 | 4.41465E-07 | 2.48742E-07 | 8.7649E-07  | 1.71364E-06 |
| <i>lpdc* (rv0462)</i>                          | 0.000105529       | 9.5216E-05  | 8.79322E-05 | 5.37133E-05 | 1.55274E-05 | 2.77536E-05 | 2.8081E-05  |
|                                                | 2.72573E-05       | 3.88432E-05 | 2.84694E-05 | 1.58991E-05 | 6.14296E-06 | 9.65306E-06 | 7.55299E-06 |
| <i>dlaT* (rv2215)</i>                          | 3.3864E-05        | 1.81924E-05 | 2.14792E-05 | 1.73273E-05 | 2.87566E-06 | 5.85063E-06 | 4.97514E-06 |
|                                                | 4.31275E-06       | 6.25983E-06 | 7.28475E-06 | 2.39674E-06 | 1.03079E-06 | 1.35554E-06 | 2.1691E-06  |
| <b>PPP</b>                                     |                   |             |             |             |             |             |             |
| <i>devB (rv1445c)</i>                          | 1.54938E-05       | 1.00575E-05 | 7.46582E-06 | 4.74119E-06 | 1.81074E-06 | 3.532E-06   | 2.09861E-06 |
|                                                | 6.79032E-06       | 2.38579E-06 | 3.34738E-06 | 2.40889E-06 | 6.29289E-07 | 1.35435E-06 | 7.41624E-07 |
| <i>zwf1 (rv1121)</i>                           | 6.57115E-06       | 4.81127E-06 | 4.99134E-06 | 4.03128E-06 | 1.35366E-06 | 2.1167E-06  | 1.36972E-06 |
|                                                | 1.80406E-06       | 3.67408E-07 | 7.04186E-07 | 1.60134E-06 | 6.60915E-07 | 7.363E-07   | 8.05535E-07 |
| <i>zwf2 (rv1447c)</i>                          | 4.83537E-06       | 1.83956E-06 | 2.51945E-06 | 1.958E-06   | 7.63559E-07 | 5.84472E-07 | 1.08132E-06 |
|                                                | 2.95568E-06       | 1.03998E-06 | 1.41608E-06 | 5.29556E-07 | 5.33406E-07 | 2.55908E-07 | 6.73376E-07 |
| <i>tkt (rv1449c)</i>                           | 5.83932E-05       | 6.69893E-05 | 6.09075E-05 | 5.06701E-05 | 2.49529E-05 | 1.79211E-05 | 1.70746E-05 |
|                                                | 2.72771E-05       | 1.17199E-05 | 2.02566E-05 | 2.14949E-05 | 2.23502E-06 | 4.03043E-06 | 2.6166E-06  |
| <b>Fatty acid <math>\beta</math> oxidation</b> |                   |             |             |             |             |             |             |
| <i>fadE5 (rv0244c)</i>                         | 8.88563E-05       | 7.92886E-05 | 0.000183644 | 0.000306994 | 0.000361944 | 5.9063E-05  | 9.44083E-05 |
|                                                | 2.95431E-05       | 1.06897E-05 | 9.3261E-05  | 0.00012582  | 7.61092E-05 | 1.85054E-05 | 3.9911E-05  |
| <i>fadE23 (rv3140)</i>                         | 3.20743E-05       | 5.10961E-05 | 5.83045E-05 | 4.30324E-05 | 3.39034E-05 | 2.37681E-05 | 1.94371E-05 |
|                                                | 7.49899E-06       | 3.20622E-06 | 1.16467E-05 | 5.14216E-06 | 1.66469E-06 | 6.27577E-06 | 7.01548E-06 |
| <i>fadA4 (rv1323)</i>                          | 0.000119368       | 9.53595E-05 | 0.000338431 | 0.000239769 | 0.000206366 | 4.43596E-05 | 6.8403E-05  |
|                                                | 4.08235E-05       | 2.6636E-05  | 0.00010769  | 4.57886E-05 | 1.55752E-05 | 2.87485E-05 | 3.20873E-05 |
| <i>fadB (rv0860)</i>                           | 0.000171995       | 8.62992E-05 | 6.32905E-05 | 2.27704E-05 | 1.26664E-05 | 2.74319E-05 | 1.69535E-05 |
|                                                | 9.36046E-05       | 3.79351E-05 | 2.15606E-05 | 9.69193E-06 | 2.49828E-06 | 1.73491E-05 | 7.2273E-06  |
| <b>TCA cycle</b>                               |                   |             |             |             |             |             |             |
| <i>citA (rv0889c)</i>                          | 2.83919E-05       | 3.11835E-05 | 2.14401E-05 | 2.19603E-05 | 1.04944E-05 | 1.22858E-05 | 1.52042E-05 |
|                                                | 1.22683E-05       | 9.82193E-06 | 1.10943E-06 | 5.68013E-06 | 1.89574E-06 | 2.36832E-06 | 6.50493E-06 |
| <i>gltA2 (rv0896)</i>                          | 9.30454E-05       | 9.61549E-05 | 6.28276E-05 | 8.3946E-05  | 1.77085E-05 | 2.46586E-05 | 2.32581E-05 |
|                                                | 3.23128E-05       | 5.24517E-05 | 1.04805E-05 | 2.27917E-05 | 3.8604E-06  | 1.64372E-05 | 1.65083E-05 |
| <i>acn (rv1475c)</i>                           | 3.06431E-05       | 1.58613E-05 | 1.14699E-05 | 7.18235E-06 | 1.18189E-06 | 2.04679E-06 | 2.15373E-06 |
|                                                | 1.14591E-05       | 2.32049E-06 | 2.63145E-06 | 3.67761E-06 | 3.89121E-07 | 1.08814E-06 | 5.22882E-07 |
| <i>icd1 (rv3339c)</i>                          | 2.60235E-05       | 1.05568E-05 | 7.74481E-06 | 3.682E-06   | 3.62162E-06 | ND          | 5.28688E-07 |
|                                                | 1.17208E-05       | 2.67525E-06 | 2.99631E-06 | 1.13029E-06 | 3.86139E-06 | ND          | 8.3123E-08  |
| <i>icd2 (rv0066c)</i>                          | 1.79135E-05       | 1.34039E-05 | 1.32357E-05 | 1.18325E-05 | 3.40407E-06 | 3.62006E-06 | 4.69232E-06 |
|                                                | 4.74252E-06       | 1.15026E-06 | 4.35992E-06 | 4.30255E-06 | 1.36261E-06 | 1.52816E-07 | 9.01917E-07 |
| <i>kgd (rv1248c)</i>                           | 7.23633E-05       | 3.84323E-05 | 4.17792E-05 | 3.06932E-05 | 9.55461E-06 | 1.3433E-05  | 1.05619E-05 |
|                                                | 2.03883E-05       | 4.83759E-06 | 7.51826E-06 | 3.57843E-06 | 1.83611E-06 | 3.06357E-07 | 3.96982E-06 |
| <i>sdhA (rv3318)</i>                           | 1.53932E-05       | 1.29993E-05 | 1.11335E-05 | 9.78081E-06 | 2.34983E-06 | 4.32151E-06 | 3.32021E-06 |
|                                                | 3.91703E-06       | 4.22348E-06 | 3.77118E-06 | 4.47151E-06 | 7.04495E-07 | 6.78269E-07 | 1.39097E-06 |
| <i>sdhC (rv3316)</i>                           | 3.85867E-05       | 3.19684E-05 | 2.03404E-05 | 2.31849E-05 | 5.27252E-06 | 7.76189E-06 | 3.93389E-06 |
|                                                | 1.531E-05         | 5.19525E-06 | 1.80206E-06 | 4.53961E-06 | 5.04856E-07 | 4.05706E-06 | 1.98844E-06 |
| <i>mdh (rv1240)</i>                            | 7.26377E-05       | 5.87525E-05 | 3.28667E-05 | 1.7638E-05  | 5.21855E-06 | 1.21265E-05 | 9.43317E-06 |
|                                                | 2.47131E-05       | 2.24937E-05 | 1.37145E-05 | 2.07786E-06 | 2.99317E-06 | 8.22615E-06 | 4.77338E-06 |

SI Table 2 (continued)

| Pathways                                        | Days of infection |             |             |             |             |             |             |
|-------------------------------------------------|-------------------|-------------|-------------|-------------|-------------|-------------|-------------|
|                                                 | 12                | 15          | 18          | 21          | 30          | 50          | 100         |
| <b>Glyoxylate shunt and methylcitrate cycle</b> |                   |             |             |             |             |             |             |
| <i>icl</i> (rv0467)                             | 0.000183312       | 0.000380105 | 0.000608721 | 0.000442637 | 0.000272511 | 0.000218837 | 0.000161962 |
|                                                 | 4.1447E-05        | 0.000159613 | 9.78344E-05 | 0.00011384  | 3.4484E-05  | 7.18729E-05 | 8.23911E-05 |
| <i>glcB</i> (rv1837c)                           | 0.000210304       | 0.000143608 | 0.000117905 | 6.11685E-05 | 2.12806E-05 | 3.09695E-05 | 3.12091E-05 |
|                                                 | 4.02926E-05       | 1.85188E-05 | 4.90975E-05 | 2.54491E-05 | 2.56937E-06 | 8.58333E-06 | 1.2008E-05  |
| <i>ppcC</i> (rv1131)                            | 1.29133E-05       | 7.11741E-05 | 0.00012553  | 0.000182437 | 4.50653E-05 | 9.9562E-05  | 6.63613E-05 |
|                                                 | 1.63523E-05       | 3.64068E-05 | 4.35858E-05 | 7.24282E-05 | 9.57736E-06 | 2.0383E-05  | 1.67576E-05 |
| <b>Gluconeogenesis</b>                          |                   |             |             |             |             |             |             |
| <i>mez</i> (rv2332)                             | 8.30555E-06       | 2.93574E-06 | 2.43633E-06 | 2.74783E-06 | 1.18532E-06 | 1.22544E-06 | 1.55868E-06 |
|                                                 | 2.03475E-06       | 7.75784E-07 | 2.93043E-07 | 2.07179E-07 | 1.12364E-07 | 5.25031E-07 | 8.27661E-07 |
| <i>pckA</i> (rv0211)                            | 0.000146958       | 0.000226716 | 0.000319643 | 0.000449064 | 0.000452811 | 0.000257331 | 0.000174815 |
|                                                 | 1.77632E-05       | 7.40275E-05 | 9.91622E-05 | 6.47696E-05 | 3.69551E-05 | 5.78635E-05 | 4.72547E-05 |
| <i>glpX</i> (rv1099c)                           | 3.5883E-05        | 2.70453E-05 | 1.7973E-05  | 1.69866E-05 | 2.91287E-06 | 9.74604E-06 | 5.21855E-06 |
|                                                 | 8.26645E-06       | 4.97042E-06 | 1.52846E-06 | 5.79479E-06 | 6.25005E-07 | 6.33363E-06 | 1.3669E-06  |
| <b>Glutamate synthesis</b>                      |                   |             |             |             |             |             |             |
| <i>gltB</i> (rv3859c)                           | 1.70454E-05       | 1.83996E-05 | 5.46115E-05 | 5.05452E-05 | 2.70532E-05 | 1.09362E-05 | 1.30658E-05 |
|                                                 | 4.59967E-06       | 8.27673E-06 | 1.62473E-05 | 5.9093E-06  | 4.10586E-06 | 6.40877E-06 | 6.60425E-06 |
| <i>gdh</i> (rv2476c)                            | 2.66211E-05       | 2.16055E-05 | 1.64666E-05 | 1.75057E-05 | 5.35476E-06 | 3.0984E-06  | 6.87099E-06 |
|                                                 | 6.47667E-06       | 5.38079E-06 | 6.05535E-06 | 4.96901E-06 | 1.42229E-06 | 1.85104E-06 | 1.72445E-06 |
| <i>glnA1</i> (rv2220)                           | 0.000117699       | 0.000132625 | 0.0001478   | 0.000124347 | 1.96032E-05 | 2.35287E-05 | 2.87047E-05 |
|                                                 | 1.17925E-05       | 2.77527E-05 | 1.0933E-05  | 4.47855E-05 | 7.17851E-06 | 9.34435E-06 | 1.04633E-05 |
| <b>TAG synthesis</b>                            |                   |             |             |             |             |             |             |
| <i>plsB2-C</i> (rv2482-3c)                      | 7.53945E-06       | 1.07415E-05 | 1.09454E-05 | 1.2094E-05  | 8.47531E-06 | 1.00793E-05 | 1.26733E-05 |
|                                                 | 1.92981E-06       | 1.28702E-06 | 9.10889E-07 | 2.40074E-06 | 3.62646E-07 | 2.1031E-06  | 5.24879E-06 |
| <i>rv2182c</i>                                  | 3.92681E-06       | 4.35022E-06 | 4.73787E-06 | 4.40532E-06 | 2.31389E-06 | 2.0624E-06  | 1.75097E-06 |
|                                                 | 1.38023E-06       | 4.43094E-07 | 1.03806E-06 | 1.29888E-06 | 5.01721E-07 | 5.26841E-07 | 7.6991E-07  |
| <i>tgs1</i> (rv3130c)                           | 8.62465E-06       | 0.000109393 | 0.000245128 | 0.000452601 | 0.000500924 | 0.00030534  | 0.000204164 |
|                                                 | 2.07228E-06       | 4.5884E-05  | 2.82764E-05 | 2.0568E-05  | 8.39744E-05 | 3.65596E-05 | 7.86104E-05 |
| <i>rv3734c</i>                                  | 0.00023576        | 0.000201308 | 0.000206792 | 0.000232691 | 9.21536E-05 | 8.13409E-05 | 5.0957E-05  |
|                                                 | 6.6799E-05        | 5.33295E-05 | 2.89146E-05 | 3.4961E-05  | 1.35174E-05 | 3.49697E-05 | 2.16843E-05 |
| <i>rv3371</i>                                   | 5.00312E-05       | 0.000105706 | 0.000107265 | 0.000155857 | 0.000121688 | 5.91089E-05 | 9.55668E-05 |
|                                                 | 2.40771E-05       | 2.71038E-05 | 6.88854E-06 | 3.91415E-05 | 2.37021E-05 | 6.42744E-06 | 4.7773E-05  |
| <b>Mycolic acid synthesis</b>                   |                   |             |             |             |             |             |             |
| <i>fas</i> (rv2524c)                            | 6.86102E-06       | 6.46905E-05 | 6.67184E-05 | 4.85915E-05 | 1.16518E-05 | 1.09658E-06 | 1.4202E-05  |
|                                                 | 5.69784E-07       | 2.09047E-05 | 2.89832E-05 | 9.20021E-06 | 3.26434E-06 | 9.43539E-07 | 7.2318E-06  |
| <i>fabH</i> (rv0533c)                           | 3.95558E-05       | 2.27834E-05 | 2.2286E-05  | 7.05329E-06 | 1.58681E-06 | 3.21403E-06 | 5.65212E-06 |
|                                                 | 1.40535E-05       | 2.33592E-06 | 5.76509E-06 | 2.46356E-06 | 1.20521E-06 | 1.53734E-06 | 2.56198E-06 |
| <i>kasA</i> (rv2245)                            | 0.000113406       | 0.000195104 | 0.000240841 | 0.000224133 | 8.7212E-05  | 5.30101E-05 | 3.31323E-05 |
|                                                 | 3.90453E-05       | 2.57451E-05 | 1.95218E-05 | 5.27117E-05 | 1.22946E-05 | 1.31813E-05 | 6.36276E-06 |
| <i>fabG1</i> (rv1483)                           | 0.000206536       | 0.00018898  | 0.00018588  | 8.74864E-05 | 2.34988E-05 | 4.64985E-05 | 4.31319E-05 |
|                                                 | 2.17541E-05       | 3.06123E-05 | 4.01673E-05 | 2.41496E-05 | 5.15526E-06 | 1.12084E-05 | 1.59558E-05 |
| <b>Multimethyl-branched lipid synthesis</b>     |                   |             |             |             |             |             |             |
| <i>accD5</i> (rv3280)                           | 0.000258119       | 0.000252825 | 0.000258071 | 0.000203479 | 6.19734E-05 | 6.60769E-05 | 5.03022E-05 |
|                                                 | 1.5557E-05        | 4.3454E-05  | 2.33638E-05 | 5.22226E-05 | 6.94686E-06 | 1.86095E-05 | 2.01831E-05 |
| <i>mas</i> (rv2940c)                            | 1.32215E-05       | 1.15131E-05 | 1.46385E-05 | 1.11693E-05 | 1.6929E-06  | 2.77187E-06 | 2.83188E-06 |
|                                                 | 5.0463E-06        | 2.3509E-06  | 5.65669E-06 | 5.68567E-06 | 1.5019E-06  | 2.07135E-06 | 1.23924E-06 |
| <i>fadD26</i> (rv2930)                          | 0.00011409        | 7.77331E-05 | 6.59766E-05 | 4.85455E-05 | 1.28845E-05 | 3.52723E-05 | 2.18025E-05 |
|                                                 | 7.49297E-06       | 2.66096E-05 | 1.99035E-05 | 1.32026E-05 | 3.47165E-06 | 9.95042E-06 | 6.24483E-06 |
| <i>fadD28</i> (rv2941)                          | 0.000177139       | 0.000222965 | 0.00017139  | 0.000141095 | 5.33261E-05 | 9.66528E-05 | 5.57203E-05 |
|                                                 | 3.48763E-05       | 7.92935E-05 | 2.3209E-05  | 1.81103E-05 | 7.3511E-06  | 5.56695E-05 | 1.56861E-05 |
| <i>papA5</i> (rv2939)                           | 8.16829E-05       | 4.38857E-05 | 3.17539E-05 | 2.0583E-05  | 9.8595E-06  | 1.64851E-05 | 1.15743E-05 |
|                                                 | 4.25053E-05       | 2.1761E-05  | 2.17165E-06 | 7.94932E-06 | 1.49314E-06 | 2.11632E-06 | 5.87264E-06 |
| <i>pks2</i> (rv3825c)                           | 2.34105E-05       | 3.52122E-05 | 3.76658E-05 | 5.95741E-05 | 3.1867E-05  | 3.59042E-05 | 2.21725E-05 |
|                                                 | 4.64722E-06       | 1.40896E-05 | 9.59033E-06 | 2.24762E-05 | 5.67847E-06 | 1.09653E-05 | 5.81364E-06 |

Enumeration of bacterial transcripts by qPCR and normalization to 16S rRNA were as previously described (Shi et al., 2003). Normalized copy numbers of *M. tuberculosis* mRNA copy numbers against 16S rRNA were expressed as mean + SD of data obtained from lungs of 3 or 4 mice per time point. \* indicates that *dlaT* and *lpdC* encode E2 and E3 subunits of pyruvate dehydrogenase, respectively (Tian et al., 2005). ND indicates under detection limit.

**SI Table 3. Biomass composition of *M. tuberculosis* at different growth states.**

| <b>Cell states</b> | <b>Biomass composition</b>                                                                                                                                                                                                                                                                                                                                                                                                                                                                                                                                                                                             |
|--------------------|------------------------------------------------------------------------------------------------------------------------------------------------------------------------------------------------------------------------------------------------------------------------------------------------------------------------------------------------------------------------------------------------------------------------------------------------------------------------------------------------------------------------------------------------------------------------------------------------------------------------|
| <b>Growing</b>     | 0.214 protein + 0.036 RNA + 0.022 DNA + 0.050 small molecules + 0.009 phosphatidylethanolamine + 0.016 triglyceride + 0.073 Phosphatidylinositol mannoside + 0.006 lipoarabinomannan + 0.188 mycolic acid–arabinogalactan-peptidoglycan complex + 0.041 poly-L-glutamate/glutamine + 0.012 cardiolipin + 0.053 lipomannan + 0.012 trehalosedimycolate + 0.006 trehalosemonomycolate + 0.004 polyacyctrehalose + 0.002 diacyctrehalose + 0.0001 mannosyl-β-1-phosphodolichol + 0.002 dimycocerosate + 0.031 phenolglycolipid antigen (PLG-Tb 1) + 0.026 sulfolipid-1 + 0.1 glucan + 47 ATP = 1 BIOMASS + 47 ADP + 47 PI |
| <b>Nongrowing</b>  | 0.016 triglyceride + 0.041 poly-L-glutamate/glutamine + 0.012 trehalose dimycolate + 47 ATP = 1 BIOMASS + 47 ADP + 47 PI                                                                                                                                                                                                                                                                                                                                                                                                                                                                                               |

**SI Table 5A. Changes of *M. tuberculosis* transcripts encoding enzymes involved in intermediary metabolism and lipid metabolism in Wayne model.**

| Pathways                                        | No. hours of Wayne cultures |         |        |         |        |         |         |         |       |       |
|-------------------------------------------------|-----------------------------|---------|--------|---------|--------|---------|---------|---------|-------|-------|
|                                                 | 0                           | 78      | 102    | 126     | 168    | 240     | 288     | 342     | 460   | 578   |
| <b>Glycolysis</b>                               |                             |         |        |         |        |         |         |         |       |       |
| <i>ppgK (rv2072)</i>                            | 1.00                        | 0.91    | 0.60   | 0.36    | 0.77   | 1.15    | 0.80    | 0.53    | 0.01  | 0.00  |
| <i>pfkA (rv3010c)</i>                           | 1.00                        | 0.86    | 0.75   | 1.14    | 1.20   | 1.85    | 1.42    | 1.49    | 0.41  | 0.19  |
| <i>pfkB (rv2029c)</i>                           | 1.00                        | 34.28   | 19.67  | 24.33   | 79.27  | 133.05  | 37.03   | 46.67   | 0.82  | 0.70  |
| <i>gap (rv1436)</i>                             | 1.00                        | 0.90    | 0.77   | 0.66    | 0.82   | 1.06    | 0.51    | 0.54    | 0.02  | 0.00  |
| <i>pykA (rv1617)</i>                            | 1.00                        | 0.66    | 0.69   | 0.62    | 0.89   | 1.19    | 0.83    | 0.72    | 0.10  | 0.04  |
| <i>*lpdC (rv0462)</i>                           | 1.00                        | 0.90    | 1.01   | 1.10    | 1.83   | 2.44    | 1.11    | 1.20    | 0.02  | 0.01  |
| <i>*dlaT (rv2215)</i>                           | 1.00                        | 2.72    | 2.02   | 3.42    | 2.54   | 3.59    | 2.20    | 2.06    | 0.09  | 0.03  |
| <b>PPP</b>                                      |                             |         |        |         |        |         |         |         |       |       |
| <i>devB (rv1445c)</i>                           | 1.00                        | 0.49    | 0.44   | 0.32    | 0.53   | 1.05    | 0.24    | 0.33    | 0.00  | 0.00  |
| <i>zwf1 (rv1221)</i>                            | 1.00                        | 0.27    | 0.26   | 0.29    | 0.42   | 1.21    | 0.47    | 0.34    | 0.00  | 0.00  |
| <i>zwf2 (rv1447c)</i>                           | 1.00                        | 0.44    | 0.42   | 0.44    | 0.21   | 0.91    | 0.29    | 0.43    | 0.00  | 0.00  |
| <i>tkt (rv1449c)</i>                            | 1.00                        | 0.77    | 0.56   | 0.75    | 0.93   | 1.40    | 0.76    | 0.87    | 0.04  | 0.02  |
| <b>Fatty acid <math>\beta</math> oxidation</b>  |                             |         |        |         |        |         |         |         |       |       |
| <i>fadE23 (rv3140)</i>                          | 1.00                        | 2.17    | 1.82   | 1.13    | 1.37   | 1.15    | 1.35    | 1.31    | 0.03  | 0.01  |
| <i>fadB (rv0860)</i>                            | 1.00                        | 1.83    | 2.08   | 2.37    | 0.97   | 1.54    | 1.01    | 1.74    | 0.07  | 0.02  |
| <i>fadA4 (rv1323)</i>                           | 1.00                        | 1.04    | 1.17   | 1.24    | 1.04   | 0.94    | 0.74    | 0.74    | 0.08  | 0.05  |
| <i>fadE5 (rv0244c)</i>                          | 1.00                        | 0.44    | 0.37   | 1.10    | 0.85   | 0.99    | 1.24    | 1.70    | 0.64  | 0.38  |
| <b>TCA cycle</b>                                |                             |         |        |         |        |         |         |         |       |       |
| <i>citA (rv0889c)</i>                           | 1.00                        | 0.45    | 0.41   | 0.42    | 0.78   | 1.35    | 0.88    | 0.76    | 0.14  | 0.05  |
| <i>gltA2 (rv0896)</i>                           | 1.00                        | 1.07    | 0.98   | 0.96    | 0.82   | 1.19    | 0.92    | 0.86    | 0.06  | 0.01  |
| <i>acn (rv1475c)</i>                            | 1.00                        | 1.07    | 0.98   | 0.96    | 0.82   | 1.18    | 0.92    | 0.86    | 0.06  | 0.01  |
| <i>icd1 (rv3339c)</i>                           | 1.00                        | 0.38    | 0.40   | 0.32    | 0.80   | 1.81    | 0.88    | 0.96    | 0.06  | 0.02  |
| <i>icd2 (rv0066c)</i>                           | 1.00                        | 0.91    | 0.60   | 0.97    | 0.68   | 1.07    | 1.11    | 0.89    | 0.02  | 0.01  |
| <i>kgd (rv1248c)</i>                            | 1.00                        | 0.75    | 0.79   | 0.68    | 0.75   | 1.11    | 0.77    | 0.78    | 0.04  | 0.02  |
| <i>sdhA (rv3318)</i>                            | 1.00                        | 0.73    | 0.85   | 0.45    | 0.53   | 0.26    | 0.22    | 0.28    | 0.01  | 0.01  |
| <i>sdhC (rv3316)</i>                            | 1.00                        | 1.24    | 0.67   | 0.53    | 0.39   | 0.39    | 0.48    | 0.39    | 0.02  | 0.00  |
| <i>mdh (rv1240)</i>                             | 1.00                        | 0.72    | 1.15   | 0.94    | 1.31   | 0.82    | 0.66    | 0.53    | 0.02  | 0.01  |
| <b>Glyoxylate shunt and methylcitrate cycle</b> |                             |         |        |         |        |         |         |         |       |       |
| <i>icl (rv0467)</i>                             | 1.00                        | 3.15    | 3.80   | 1.86    | 1.01   | 0.77    | 0.28    | 0.54    | 0.06  | 0.02  |
| <i>glcB (rv1837c)</i>                           | 1.00                        | 0.78    | 0.89   | 0.99    | 1.04   | 1.17    | 0.91    | 0.71    | 0.01  | 0.01  |
| <i>prpC (rv1131)</i>                            | 1.00                        | 1.17    | 5.97   | 0.99    | 1.10   | 0.57    | 0.38    | 0.53    | 0.06  | 0.01  |
| <b>Gluconeogenesis</b>                          |                             |         |        |         |        |         |         |         |       |       |
| <i>mez (rv2332)</i>                             | 1.00                        | 0.81    | 1.12   | 0.93    | 1.28   | 1.74    | 0.57    | 0.83    | 0.04  | 0.03  |
| <i>pckA (rv0211)</i>                            | 1.00                        | 1.08    | 1.37   | 2.59    | 1.68   | 1.87    | 0.87    | 1.11    | 0.37  | 0.09  |
| <i>pca (rv2967c)</i>                            | 1.00                        | 0.45    | 0.39   | 0.31    | 0.48   | 0.52    | 0.23    | 0.23    | 0.02  | 0.03  |
| <i>glpX (rv1099c)</i>                           | 1.00                        | 1.05    | 0.87   | 0.77    | 1.05   | 1.13    | 0.44    | 0.39    | 0.00  | 0.00  |
| <b>Glutamate metabolism</b>                     |                             |         |        |         |        |         |         |         |       |       |
| <i>gltB (rv3859c)</i>                           | 1.00                        | 0.61    | 0.48   | 0.42    | 0.79   | 1.12    | 0.54    | 0.62    | 0.01  | 0.01  |
| <i>gdh (rv2476c)</i>                            | 1.00                        | 0.24    | 0.21   | 0.21    | 0.50   | 0.62    | 0.33    | 0.32    | 0.02  | 0.01  |
| <i>glnA1 (rv2220)</i>                           | 1.00                        | 1.27    | 1.35   | 0.78    | 0.92   | 0.81    | 0.34    | 0.36    | 0.02  | 0.01  |
| <b>TAG synthesis</b>                            |                             |         |        |         |        |         |         |         |       |       |
| <i>plsB2-C (rv2482-3c)</i>                      | 1.00                        | 0.50    | 0.72   | 0.54    | 0.56   | 1.06    | 1.25    | 1.23    | 0.08  | 0.05  |
| <i>rv2182c</i>                                  | 1.00                        | 0.69    | 0.60   | 0.69    | 0.94   | 2.03    | 1.14    | 1.49    | 0.06  | 0.02  |
| <i>tgs1 (rv3130c)</i>                           | 1.00                        | 1305.38 | 379.93 | 1119.12 | 888.32 | 1705.66 | 1310.55 | 1253.38 | 92.91 | 15.59 |
| <i>rv3734c</i>                                  | 1.00                        | 1.37    | 1.64   | 1.11    | 0.74   | 0.65    | 0.37    | 0.38    | 0.05  | 0.02  |
| <i>rv3371</i>                                   | 1.00                        | 0.57    | 0.97   | 0.41    | 0.82   | 1.13    | 0.76    | 1.50    | 0.06  | 0.03  |
| <b>Mycolic acid synthesis</b>                   |                             |         |        |         |        |         |         |         |       |       |
| <i>fas (rv2524c)</i>                            | 1.00                        | 1.88    | 5.25   | 1.66    | 1.27   | 1.19    | 0.42    | 0.85    | 0.01  | 0.01  |
| <i>fabH (rv0533c)</i>                           | 1.00                        | 0.70    | 0.58   | 0.33    | 0.56   | 0.59    | 0.25    | 0.29    | 0.01  | 0.00  |
| <i>kasA (rv2245)</i>                            | 1.00                        | 1.97    | 4.88   | 2.07    | 1.67   | 0.70    | 0.17    | 0.70    | 0.02  | 0.00  |
| <i>fabG1 (rv1483)</i>                           | 1.00                        | 0.68    | 0.96   | 1.08    | 2.45   | 2.57    | 1.21    | 1.15    | 0.02  | 0.01  |
| <b>Multimethyl-branched lipid synthesis</b>     |                             |         |        |         |        |         |         |         |       |       |
| <i>accD5 (rv3280)</i>                           | 1.00                        | 1.26    | 1.63   | 1.08    | 1.6    | 1.27    | 0.7     | 0.7     | 0.01  | 0.01  |
| <i>mas (rv2940c)</i>                            | 1.00                        | 0.69    | 2.19   | 0.94    | 1.72   | 1.43    | 0.79    | 1.05    | 0.01  | 0.00  |
| <i>fadD26 (rv2930)</i>                          | 1.00                        | 0.58    | 2.11   | 1.09    | 1.74   | 1.25    | 0.35    | 0.53    | 0.01  | 0.01  |
| <i>fadD28 (rv2941)</i>                          | 1.00                        | 1.14    | 1.60   | 1.20    | 1.13   | 1.22    | 0.89    | 1.04    | 0.04  | 0.01  |
| <i>papA5 (rv2939)</i>                           | 1.00                        | 0.74    | 1.55   | 0.94    | 1.37   | 1.14    | 0.7     | 0.89    | 0.06  | 0.02  |
| <i>pks2 (rv3825c)</i>                           | 1.00                        | 0.79    | 3.26   | 1.23    | 0.62   | 0.52    | 0.13    | 0.2     | 0.01  | 0.01  |

**SI Table 5B. Changes of *M. tuberculosis* transcripts encoding enzymes involved in intermediary metabolism and lipid metabolism after treatment with NO.**

| Pathways               | NO concentration (µM) |       |        |        |       |       |
|------------------------|-----------------------|-------|--------|--------|-------|-------|
|                        | 0                     | 25    | 50     | 100    | 250   | 500   |
| <b>Glycolysis</b>      |                       |       |        |        |       |       |
| <i>ppgK</i> (rv2072)   | 1.00                  | 1.02  | 0.93   | 0.99   | 0.41  | 0.27  |
| <i>pfkA</i> (rv3010c)  | 1.00                  | 0.93  | 0.79   | 0.74   | 0.54  | 0.61  |
| <i>pfkB</i> (rv2029c)  | 1.00                  | 92.25 | 177.38 | 157.03 | 20.14 | 14.59 |
| <i>gap</i> (rv1436)    | 1.00                  | 0.93  | 1.00   | 0.72   | 0.37  | 0.27  |
| <i>pykA</i> (rv1617)   | 1.00                  | 0.94  | 0.92   | 0.72   | 0.23  | 0.16  |
| * <i>lpdC</i> (rv0462) | 1.00                  | 1.18  | 1.09   | 0.68   | 0.32  | 0.24  |
| * <i>dlaT</i> (rv2215) | 1.00                  | 0.89  | 0.78   | 0.60   | 0.55  | 0.53  |

**PPP**

|                       |      |      |      |      |      |      |
|-----------------------|------|------|------|------|------|------|
| <i>devB</i> (rv1445c) | 1.00 | 0.79 | 0.53 | 0.36 | 0.05 | 0.07 |
| <i>zwf1</i> (rv1121)  | 1.00 | 1.01 | 0.67 | 0.42 | 0.16 | 0.25 |
| <i>zwf2</i> (rv1447c) | 1.00 | 0.90 | 0.70 | 0.54 | 0.19 | 0.13 |
| <i>tkt</i> (rv1449c)  | 1.00 | 1.17 | 0.91 | 0.71 | 0.76 | 0.96 |

**Fatty acid β oxidation**

|                        |      |      |      |      |      |      |
|------------------------|------|------|------|------|------|------|
| <i>fadE23</i> (rv3140) | 1.00 | 1.87 | 1.69 | 4.18 | 7.20 | 5.89 |
| <i>fadB</i> (rv0860)   | 1.00 | 1.05 | 0.78 | 0.50 | 2.92 | 4.34 |
| <i>fadA4</i> (rv1323)  | 1.00 | 1.07 | 1.13 | 0.95 | 0.73 | 0.76 |
| <i>fadE5</i> (rv0244c) | 1.00 | 1.02 | 1.32 | 1.60 | 2.57 | 3.71 |

**TCA cycle**

|                       |      |      |      |      |      |      |
|-----------------------|------|------|------|------|------|------|
| <i>citA</i> (rv0889c) | 1.00 | 0.93 | 0.92 | 0.85 | 0.32 | 0.32 |
| <i>gltA2</i> (rv0896) | 1.00 | 0.99 | 0.79 | 0.77 | 0.76 | 0.59 |
| <i>acn</i> (rv1475c)  | 1.00 | 0.99 | 0.79 | 0.78 | 0.76 | 0.60 |
| <i>icd1</i> (rv3339c) | 1.00 | 0.82 | 0.75 | 0.51 | 0.13 | 0.11 |
| <i>icd2</i> (rv0066c) | 1.00 | 1.03 | 0.87 | 0.80 | 1.19 | 1.60 |
| <i>kgd</i> (rv1248c)  | 1.00 | 0.99 | 0.78 | 0.43 | 0.47 | 0.68 |
| <i>sdhA</i> (rv3318)  | 1.00 | 1.72 | 0.87 | 0.61 | 0.19 | 0.11 |
| <i>sdhC</i> (rv3316)  | 1.00 | 2.07 | 1.30 | 1.12 | 0.68 | 0.43 |
| <i>mdh</i> (rv1240)   | 1.00 | 1.03 | 0.89 | 0.48 | 0.17 | 0.06 |

**Glyoxylate shunt and methylcitrate cycle**

|                       |      |      |      |      |      |      |
|-----------------------|------|------|------|------|------|------|
| <i>icl</i> (rv0467)   | 1.00 | 1.00 | 1.20 | 3.61 | 0.67 | 0.87 |
| <i>glcB</i> (rv1837c) | 1.00 | 0.84 | 0.73 | 0.67 | 0.25 | 0.35 |
| <i>prpC</i> (rv1131)  | 1.00 | 0.92 | 1.02 | 0.70 | 0.27 | 0.28 |

**Gluconeogenesis**

|                       |      |      |      |      |      |      |
|-----------------------|------|------|------|------|------|------|
| <i>mez</i> (rv2332)   | 1.00 | 0.97 | 0.70 | 0.39 | 0.22 | 0.16 |
| <i>pckA</i> (rv0211)  | 1.00 | 0.84 | 1.18 | 2.16 | 2.17 | 2.41 |
| <i>pca</i> (rv2967c)  | 1.00 | 0.73 | 0.67 | 0.57 | 0.13 | 0.26 |
| <i>glpX</i> (rv1099c) | 1.00 | 1.05 | 1.00 | 0.67 | 0.13 | 0.05 |

**Glutamate metabolism**

|                       |      |      |      |      |      |      |
|-----------------------|------|------|------|------|------|------|
| <i>gltB</i> (rv3859c) | 1.00 | 0.94 | 0.86 | 0.58 | 0.20 | 0.25 |
| <i>gdh</i> (rv2476c)  | 1.00 | 0.98 | 0.83 | 0.51 | 0.22 | 0.46 |
| <i>glnA1</i> (rv2220) | 1.00 | 1.02 | 0.94 | 0.57 | 0.20 | 0.11 |

**TAG synthesis**

|                            |      |        |        |        |         |         |
|----------------------------|------|--------|--------|--------|---------|---------|
| <i>plsB2-C</i> (rv2482-3c) | 1.00 | 1.02   | 0.61   | 0.26   | 0.19    | 0.27    |
| <i>rv2182c</i>             | 1.00 | 1.23   | 0.76   | 0.73   | 1.19    | 1.05    |
| <i>tgs1</i> (rv3130c)      | 1.00 | 285.68 | 734.40 | 851.58 | 2080.99 | 2062.32 |
| <i>rv3734c</i>             | 1.00 | 1.56   | 0.94   | 0.68   | 1.38    | 1.39    |
| <i>rv3371</i>              | 1.00 | 0.88   | 0.90   | 0.63   | 0.36    | 0.32    |

**Mycolic acid synthesis**

|                       |      |      |      |      |      |      |
|-----------------------|------|------|------|------|------|------|
| <i>fas</i> (rv2524c)  | 1.00 | 1.52 | 0.85 | 2.22 | 1.14 | 0.40 |
| <i>fabH</i> (rv0533c) | 1.00 | 0.92 | 0.69 | 0.46 | 0.08 | 0.10 |
| <i>kasA</i> (rv2245)  | 1.00 | 1.58 | 1.47 | 2.96 | 0.92 | 0.31 |
| <i>fabG1</i> (rv1483) | 1.00 | 0.95 | 1.10 | 0.45 | 0.17 | 0.05 |

**Multimethyl-branched lipid synthesis**

|                        |      |      |      |      |      |      |
|------------------------|------|------|------|------|------|------|
| <i>accD5</i> (rv3280)  | 1.00 | 1.52 | 0.92 | 0.59 | 0.19 | 0.06 |
| <i>mas</i> (rv2940c)   | 1.00 | 1.29 | 0.98 | 0.54 | 0.16 | 0.13 |
| <i>fadD26</i> (rv2930) | 1.00 | 1.72 | 1.32 | 0.88 | 0.21 | 0.08 |
| <i>fadD28</i> (rv2941) | 1.00 | 1.57 | 1.08 | 0.81 | 0.54 | 0.57 |
| <i>papA5</i> (rv2939)  | 1.00 | 1.77 | 0.99 | 0.53 | 0.18 | 0.14 |
| <i>pks2</i> (rv3825c)  | 1.00 | 1.40 | 1.00 | 0.75 | 0.65 | 0.42 |



**SI Table 5C. Normalized copy number of *M. tuberculosis* transcripts encoding enzymes involved in central metabolism and lipid metabolism in cultures after treatment with DETA/NO**

| Pathways                                       | NO concentration ( $\mu\text{M}$ ) |             |             |             |            |             |
|------------------------------------------------|------------------------------------|-------------|-------------|-------------|------------|-------------|
|                                                | Mid-log                            | 25          | 50          | 100         | 250        | 500         |
| <b>Glycolysis</b>                              |                                    |             |             |             |            |             |
| <i>ppgK (rv2702)</i>                           | 6.41129E-06                        | 6.54413E-06 | 5.9641E-06  | 6.36131E-06 | 2.6058E-06 | 1.7536E-06  |
|                                                | 9.75777E-07                        | 2.1956E-06  | 3.07119E-06 | 8.98826E-07 | 3.3709E-07 | 7.01213E-07 |
| <i>pfkA (rv3010c)</i>                          | 1.34428E-05                        | 1.25469E-05 | 1.05821E-05 | 1.00135E-05 | 7.2679E-06 | 8.15135E-06 |
|                                                | 4.51153E-07                        | 2.25848E-06 | 2.72717E-06 | 2.7028E-06  | 2.5696E-06 | 2.36057E-06 |
| <i>pfkB (rv2029c)</i>                          | 1.9298E-07                         | 1.78015E-05 | 3.42307E-05 | 3.03039E-05 | 3.8859E-06 | 2.81655E-06 |
|                                                | 8.99532E-08                        | 2.3269E-06  | 1.14736E-05 | 8.11208E-06 | 2.0689E-06 | 8.57418E-07 |
| <i>gap (rv1436)</i>                            | 6.55363E-05                        | 6.06639E-05 | 6.52423E-05 | 4.72468E-05 | 2.4282E-05 | 1.79785E-05 |
|                                                | 6.30539E-06                        | 1.80304E-05 | 1.89366E-05 | 1.52454E-05 | 3.8749E-06 | 4.13419E-06 |
| <i>pykA (rv1617)</i>                           | 2.44476E-05                        | 2.29904E-05 | 2.25971E-05 | 1.7626E-05  | 5.6649E-06 | 3.81512E-06 |
|                                                | 4.08974E-06                        | 4.72539E-06 | 6.98992E-06 | 5.84003E-06 | 1.2841E-06 | 4.36365E-07 |
| <i>lpdc* (rv0462)</i>                          | 4.4903E-05                         | 5.29277E-05 | 4.90298E-05 | 3.05519E-05 | 1.4556E-05 | 1.0669E-05  |
|                                                | 7.16242E-06                        | 1.29726E-05 | 1.57069E-05 | 7.68346E-06 | 9.8515E-07 | 5.47945E-07 |
| <i>dlaT* (rv2215)</i>                          | 6.23065E-05                        | 5.52171E-05 | 4.88252E-05 | 3.74347E-05 | 3.4497E-05 | 3.29796E-05 |
|                                                | 1.2205E-05                         | 1.15475E-05 | 1.40708E-05 | 1.41545E-05 | 6.2084E-06 | 3.61446E-06 |
| <b>PPP</b>                                     |                                    |             |             |             |            |             |
| <i>devB (rv1445c)</i>                          | 8.01413E-05                        | 6.30507E-05 | 4.26063E-05 | 2.84594E-05 | 4.3785E-06 | 5.5402E-06  |
|                                                | 2.78444E-05                        | 1.55003E-05 | 1.23563E-05 | 9.31361E-06 | 1.7382E-06 | 1.73557E-06 |
| <i>zwf1 (rv1121)</i>                           | 1.57791E-05                        | 1.59921E-05 | 1.05361E-05 | 6.55043E-06 | 2.4982E-06 | 3.90085E-06 |
|                                                | 5.42932E-06                        | 5.46036E-06 | 1.51321E-06 | 1.22806E-06 | 7.3567E-07 | 6.08579E-07 |
| <i>zwf2 (rv1447c)</i>                          | 1.45823E-05                        | 1.30669E-05 | 1.02131E-05 | 7.81352E-06 | 2.7221E-06 | 1.82487E-06 |
|                                                | 6.30785E-06                        | 2.43534E-06 | 8.5749E-07  | 3.32547E-06 | 7.4314E-07 | 6.25016E-07 |
| <i>tkt (rv1449c)</i>                           | 0.000350979                        | 0.00041113  | 0.000319724 | 0.000249715 | 0.00026735 | 0.000336712 |
|                                                | 5.65143E-05                        | 7.96078E-05 | 7.37463E-05 | 5.23233E-05 | 8.3653E-05 | 4.37531E-05 |
| <b>Fatty acid <math>\beta</math> oxidation</b> |                                    |             |             |             |            |             |
| <i>fadE5 (rv0244c)</i>                         | 6.46545E-06                        | 6.59746E-06 | 8.51014E-06 | 1.03616E-05 | 1.6613E-05 | 2.40066E-05 |
|                                                | 1.11471E-06                        | 1.06163E-06 | 1.96577E-06 | 3.70814E-06 | 1.7599E-06 | 7.30527E-06 |
| <i>fadE23 (rv3140)</i>                         | 1.98401E-05                        | 3.7161E-05  | 3.34396E-05 | 8.30049E-05 | 0.0001429  | 0.000116759 |
|                                                | 6.05266E-06                        | 5.11408E-06 | 8.35039E-06 | 1.67116E-05 | 4.3958E-05 | 3.26731E-05 |
| <i>fadA4 (rv1323)</i>                          | 8.62039E-05                        | 9.24344E-05 | 9.70917E-05 | 8.1535E-05  | 6.2561E-05 | 6.51919E-05 |
|                                                | 1.45663E-05                        | 2.02757E-05 | 3.09946E-05 | 2.28247E-05 | 8.682E-06  | 7.23384E-06 |
| <i>fadB (rv0860)</i>                           | 3.32564E-06                        | 3.49005E-06 | 2.59511E-06 | 1.65988E-06 | 9.7007E-06 | 1.44247E-05 |
|                                                | 1.41459E-06                        | 7.98127E-07 | 5.96722E-07 | 6.70186E-07 | 1.1999E-06 | 3.50226E-06 |
| <b>TCA cycle</b>                               |                                    |             |             |             |            |             |
| <i>citA (rv0889c)</i>                          | 1.25753E-05                        | 1.17124E-05 | 1.15517E-05 | 1.06489E-05 | 4.0082E-06 | 4.06181E-06 |
|                                                | 1.5201E-06                         | 1.38274E-06 | 2.98305E-06 | 3.45666E-06 | 6.5194E-07 | 7.04345E-07 |
| <i>glfA2 (rv0896)</i>                          | 4.17983E-05                        | 4.14736E-05 | 3.28892E-05 | 3.23829E-05 | 3.1696E-05 | 2.48405E-05 |
|                                                | 1.10614E-05                        | 1.15027E-05 | 9.59838E-06 | 8.65827E-06 | 9.4108E-07 | 5.10601E-06 |
| <i>acn (rv1475c)</i>                           | 3.05073E-05                        | 3.02009E-05 | 2.40199E-05 | 2.36443E-05 | 2.3088E-05 | 1.81642E-05 |
|                                                | 8.0353E-06                         | 8.35333E-06 | 7.00323E-06 | 6.30913E-06 | 6.5085E-07 | 3.7091E-06  |
| <i>icd1 (rv3339c)</i>                          | 2.13128E-06                        | 1.73887E-06 | 1.59921E-06 | 1.09589E-06 | 2.721E-07  | 2.38431E-07 |
|                                                | 4.19267E-07                        | 4.58467E-07 | 5.35577E-07 | 3.71453E-07 | 6.7226E-08 | 6.24251E-08 |
| <i>icd2 (rv0066c)</i>                          | 1.13033E-05                        | 1.16914E-05 | 9.85107E-06 | 8.99199E-06 | 1.3471E-05 | 1.81038E-05 |
|                                                | 2.50331E-06                        | 2.57336E-06 | 1.67135E-06 | 3.27511E-06 | 1.881E-06  | 3.01396E-06 |
| <i>kgd (rv1248c)</i>                           | 3.55388E-05                        | 3.50483E-05 | 2.7786E-05  | 1.51628E-05 | 1.6755E-05 | 2.40749E-05 |
|                                                | 8.60016E-06                        | 7.96486E-06 | 5.46463E-06 | 3.97673E-06 | 2.9404E-06 | 3.39307E-06 |
| <i>sdhA (rv3318)</i>                           | 2.84393E-06                        | 4.88904E-06 | 2.46302E-06 | 1.74534E-06 | 5.2614E-07 | 3.02237E-07 |
|                                                | 5.73408E-07                        | 6.27363E-07 | 4.26105E-07 | 2.05725E-07 | 1.5175E-07 | 2.8119E-08  |
| <i>sdhC (rv3316)</i>                           | 2.63895E-06                        | 5.45583E-06 | 3.43553E-06 | 2.94738E-06 | 1.7901E-06 | 1.14784E-06 |
|                                                | 4.03829E-07                        | 1.02108E-06 | 8.4061E-07  | 5.26875E-07 | 9.366E-08  | 5.81201E-07 |
| <i>mdh (rv1240)</i>                            | 0.000218589                        | 0.000224541 | 0.000193879 | 0.0001051   | 3.7003E-05 | 1.3985E-05  |
|                                                | 5.37614E-05                        | 5.37037E-05 | 6.93912E-05 | 2.31412E-05 | 5.4058E-06 | 2.32699E-06 |

| Pathways                                        | NO concentration ( $\mu\text{M}$ ) |             |             |             |            |             |
|-------------------------------------------------|------------------------------------|-------------|-------------|-------------|------------|-------------|
|                                                 | 12                                 | 15          | 18          | 21          | 30         | 50          |
| <b>Glyoxylate shunt and methylcitrate cycle</b> |                                    |             |             |             |            |             |
| <i>icl</i> (rv0467)                             | 6.99063E-06                        | 7.0715E-06  | 8.45594E-06 | 2.60662E-05 | 4.7016E-06 | 6.09446E-06 |
|                                                 | 1.39946E-06                        | 1.11615E-06 | 1.69899E-06 | 7.90421E-06 | 4.9337E-07 | 6.50023E-07 |
| <i>glcB</i> (rv1837c)                           | 0.000292385                        | 0.000247044 | 0.000212092 | 0.000197356 | 7.4104E-05 | 0.000101782 |
|                                                 | 5.47967E-05                        | 9.70429E-05 | 6.48172E-05 | 6.53571E-05 | 2.5474E-05 | 9.11626E-06 |
| <i>pprC</i> (rv1131)                            | 1.18579E-06                        | 1.09518E-06 | 1.2072E-06  | 8.30144E-07 | 3.2063E-07 | 3.29167E-07 |
|                                                 | 3.29637E-07                        | 3.189E-07   | 3.29085E-07 | 6.84203E-08 | 1.6496E-07 | 1.70798E-07 |
| <b>Gluconeogenesis</b>                          |                                    |             |             |             |            |             |
| <i>mez</i> (rv2332)                             | 8.67285E-06                        | 8.43383E-06 | 6.10206E-06 | 3.34809E-06 | 1.9255E-06 | 1.395E-06   |
|                                                 | 2.04803E-06                        | 2.10379E-06 | 6.4372E-07  | 9.11256E-07 | 3.3467E-07 | 4.06739E-07 |
| <i>pckA</i> (rv0211)                            | 0.000146958                        | 0.000226716 | 0.000319643 | 0.000449064 | 0.00045281 | 0.000257331 |
|                                                 | 1.77632E-05                        | 7.40275E-05 | 9.91622E-05 | 6.47696E-05 | 3.6955E-05 | 5.78635E-05 |
| <i>pca</i> (rv2967c)                            | 5.59837E-06                        | 4.08981E-06 | 3.74656E-06 | 4.02317E-06 | 7.1416E-07 | 1.47689E-06 |
|                                                 | 1.68216E-06                        | 1.13379E-06 | 7.67879E-07 | 6.46531E-07 | 9.4113E-08 | 5.55835E-07 |
| <i>glpX</i> (rv1099c)                           | 6.87927E-05                        | 7.21687E-05 | 6.89724E-05 | 4.63258E-05 | 8.6165E-06 | 3.32607E-06 |
|                                                 | 7.5643E-06                         | 2.25725E-05 | 2.2089E-05  | 1.69871E-05 | 8.3358E-07 | 3.65944E-07 |
| <b>Glutamate synthesis</b>                      |                                    |             |             |             |            |             |
| <i>gltB</i> (rv3859c)                           | 2.76587E-05                        | 2.60949E-05 | 2.37659E-05 | 1.60808E-05 | 5.5599E-06 | 6.93609E-06 |
|                                                 | 3.26889E-06                        | 5.61951E-06 | 6.7952E-06  | 6.08998E-06 | 1.304E-06  | 9.88743E-07 |
| <i>gdh</i> (rv2476c)                            | 0.00023002                         | 0.000224283 | 0.000190848 | 0.00011828  | 5.1424E-05 | 0.000106703 |
|                                                 | 5.14536E-05                        | 5.6196E-05  | 7.27483E-05 | 3.58407E-05 | 8.2257E-06 | 1.89709E-05 |
| <i>glnA1</i> (rv2220)                           | 4.44458E-05                        | 4.53437E-05 | 4.18374E-05 | 2.55344E-05 | 8.7069E-06 | 4.854E-06   |
|                                                 | 1.52422E-06                        | 6.47203E-06 | 1.08183E-05 | 1.22333E-05 | 9.7577E-07 | 7.05804E-07 |
| <b>TAG synthesis</b>                            |                                    |             |             |             |            |             |
| <i>plsB2-C</i> (rv2482-3c)                      | 4.75128E-06                        | 4.83424E-06 | 2.90459E-06 | 1.2352E-06  | 9.1534E-07 | 1.29667E-06 |
|                                                 | 2.12769E-06                        | 1.1228E-06  | 3.02207E-07 | 4.24701E-09 | 2.0723E-07 | 6.10353E-07 |
| <i>rv2182c</i>                                  | 1.4077E-06                         | 1.73047E-06 | 1.0664E-06  | 1.02582E-06 | 1.6739E-06 | 1.4829E-06  |
|                                                 | 4.42913E-07                        | 4.64219E-07 | 2.23699E-07 | 4.08058E-07 | 3.9836E-07 | 4.06917E-07 |
| <i>tgs1</i> (rv3130c)                           | 8.26473E-08                        | 2.36105E-05 | 6.06964E-05 | 7.03808E-05 | 0.00017199 | 0.000170445 |
|                                                 | 3.71999E-08                        | 1.68055E-06 | 1.52791E-05 | 3.38651E-05 | 2.447E-05  | 4.68265E-05 |
| <i>rv3734c</i>                                  | 2.83036E-06                        | 4.4071E-06  | 2.65261E-06 | 1.91451E-06 | 3.9113E-06 | 3.92816E-06 |
|                                                 | 4.37686E-07                        | 1.01928E-06 | 1.80029E-07 | 3.12662E-07 | 9.1121E-07 | 1.36688E-06 |
| <i>rv3371</i>                                   | 9.62158E-07                        | 8.43253E-07 | 8.62733E-07 | 6.05532E-07 | 3.4675E-07 | 3.12213E-07 |
|                                                 | 1.895E-07                          | 9.95179E-08 | 1.57513E-07 | 1.881E-07   | 1.2606E-07 | 7.18908E-08 |
| <b>Mycolic acid synthesis</b>                   |                                    |             |             |             |            |             |
| <i>fas</i> (rv2524c)                            | 1.43495E-05                        | 2.18317E-05 | 1.22221E-05 | 3.1829E-05  | 1.6359E-05 | 5.71956E-06 |
|                                                 | 3.34775E-06                        | 7.79826E-06 | 9.03918E-07 | 6.60515E-06 | 5.5389E-06 | 1.21321E-06 |
| <i>fabH</i> (rv0533c)                           | 5.79071E-06                        | 5.30049E-06 | 4.02181E-06 | 2.64904E-06 | 4.5045E-07 | 5.66621E-07 |
|                                                 | 1.71731E-06                        | 1.04624E-06 | 1.66028E-07 | 9.70144E-07 | 2.3652E-07 | 1.55921E-07 |
| <i>kasA</i> (rv2245)                            | 1.18343E-05                        | 1.87243E-05 | 1.74023E-05 | 3.50464E-05 | 1.0837E-05 | 3.65225E-06 |
|                                                 | 9.48304E-07                        | 6.14968E-06 | 5.20345E-06 | 9.73305E-06 | 2.8841E-06 | 1.00461E-06 |
| <i>fabG1</i> (rv1483)                           | 5.00449E-06                        | 4.76074E-06 | 5.49446E-06 | 2.25801E-06 | 8.411E-07  | 2.59343E-07 |
|                                                 | 2.93571E-06                        | 1.05352E-06 | 5.00779E-07 | 7.83753E-07 | 1.0049E-07 | 6.69065E-08 |
| <b>Multimethyl-branched lipid synthesis</b>     |                                    |             |             |             |            |             |
| <i>accD5</i> (rv3280)                           | 7.57568E-06                        | 1.14987E-05 | 6.94349E-06 | 4.4541E-06  | 1.455E-06  | 4.42681E-07 |
|                                                 | 7.02198E-07                        | 3.55368E-06 | 7.52877E-07 | 1.16659E-06 | 2.9054E-07 | 2.4358E-07  |
| <i>mas</i> (rv2940c)                            | 2.61265E-06                        | 3.35776E-06 | 2.57332E-06 | 1.4107E-06  | 4.1087E-07 | 3.28828E-07 |
|                                                 | 7.59262E-07                        | 2.09251E-06 | 7.02174E-07 | 2.00641E-07 | 1.0378E-07 | 1.36348E-07 |
| <i>fadD26</i> (rv2930)                          | 2.1222E-06                         | 3.65793E-06 | 2.80162E-06 | 1.86927E-06 | 4.4213E-07 | 1.63985E-07 |
|                                                 | 2.20071E-07                        | 1.18452E-06 | 8.81952E-07 | 3.06926E-07 | 1.3362E-07 | 3.17296E-08 |
| <i>fadD28</i> (rv2941)                          | 9.53487E-06                        | 1.49334E-05 | 1.02913E-05 | 7.73019E-06 | 5.1767E-06 | 5.42484E-06 |
|                                                 | 1.81059E-06                        | 4.68906E-06 | 9.64616E-07 | 1.93036E-06 | 8.0959E-07 | 2.18237E-06 |
| <i>papA5</i> (rv2939)                           | 3.23856E-06                        | 5.73833E-06 | 3.1949E-06  | 1.712E-06   | 5.7212E-07 | 4.4266E-07  |
|                                                 | 4.15311E-07                        | 1.692E-06   | 6.17677E-07 | 1.38023E-07 | 1.5453E-07 | 2.7496E-07  |
| <i>pks2</i> (rv3825c)                           | 2.96369E-06                        | 4.14784E-06 | 2.96511E-06 | 2.22267E-06 | 1.9296E-06 | 1.23327E-06 |
|                                                 | 6.55902E-07                        | 1.17119E-06 | 2.17857E-07 | 3.35034E-07 | 3.4458E-07 | 5.65964E-07 |

*M. tuberculosis* mid-log cultures were exposed to gradual oxygen depletion or treated with increasing concentrations of the NO donor DETA/NO for 30 min, as described in Experimental procedure. RNA extraction, reverse transcription and real-time PCR with molecular beacons were described in Shi et al (Shi et al., 2003). Levels of transcripts per cell were obtained by dividing mRNA copy number by the corresponding 16S rRNA copy number. Shown are ratios between normalized mRNA copy numbers at various time points during hypoxia or 30 min after NO treatment and the data from mid-log-phase culture. The hypoxia data are from one of two independent repeats, which gave very similar results (SI Table 5A). The NO treatment data were obtained from triplicate samples (SI Table 5B); shown in SI Table 5C are means and SD of normalized mRNA copy number from triplicate cultures. \*indicates that *dlaT* and *lpdC* encode E2 and E3 subunits of pyruvate dehydrogenase, respectively (Tian et al., 2005).

**SI Table 6. Composition of simplified Middlebrook 7H9 and LIM minimal media.**

6A. Modified Middlebrook 7H9 Medium

| <b>Components</b>       | <b>Quantity (mg per 1000ml)</b> |
|-------------------------|---------------------------------|
| Ammonium Sulfate        | 500                             |
| L-Glutamic Acid         | 500                             |
| Sodium Citrate          | 100                             |
| Pyridoxine              | 1                               |
| Biotin                  | 0.5                             |
| Disodium Phosphate      | 2,500                           |
| Monopotassium Phosphate | 1,000                           |
| Ferric Ammonium Citrate | 40                              |
| Magnesium Sulfate       | 50                              |
| Calcium Chloride        | 0.5                             |
| Zinc Sulfate            | 1                               |
| Copper Sulfate          | 1                               |
| Sodium Chloride         | 850                             |
| Glucose                 | 2,000                           |
| Tyloxapol               | 500                             |

6B. LIM minimal medium

| <b>Components</b>              | <b>Quantity (mg per 1000ml)</b> |
|--------------------------------|---------------------------------|
| Disodium Phosphate Anhydrous   | 2,200                           |
| Potassium Dihydrogen Phosphate | 1,000                           |
| Ferric Chloride Hexahydrate    | 0.5                             |
| Magnesium Sulfate Heptahydrate | 20                              |
| Calcium Chloride               | 0.5                             |
| Ammonium Chloride              | 200                             |
| Glucose                        | 10,000                          |
| Tyloxapol                      | 500                             |

**SI Table 7. Activity of key metabolic enzymes during hypoxia**

| <b>Enzyme</b>          | <b>Activity</b>  | <b>Time</b>  | <b>Mid-log culture</b> | <b>Hr 70</b>   | <b>Hr 115</b>   | <b>Hr 150</b> | <b>Hr 220</b> |
|------------------------|------------------|--------------|------------------------|----------------|-----------------|---------------|---------------|
| Isocitrate lyase       | 1.9 +/- 0.0      | 6.3 +/- 1.0  | 7.3 +/- 1.2            | 4.3 +/- 0.3    | 0.5 +/- 0.0     |               |               |
| PEP carboxykinase      | 22.5 +/- 2.5     | 34.7 +/- 3.3 | 50.5 +/- 1.6           | NM             | 132.3 +/- 16.4  |               |               |
| Methylcitrate synthase | 4.1 +/- 0.6      | 1.1 +/- 0.2  | 2.3 +/- 0.4            | 0.6 +/- 0.1    | 3.2 +/- 0.5     |               |               |
| Malate dehydrogenase   | 1,210.5 +/- 21.1 | NM           | NM                     | 892.1 +/- 65.9 | 530.1 +/- 149.8 |               |               |
| Glutamine synthase     | 4.2 +/- 1.5      | NM           | NM                     | 0.5 +/- 0.4    | 0.4 +/- 0.1     |               |               |
| Glutamate synthase     | 4.1 +/- 0.7      | NM           | NM                     | < 0.1          | < 0.1           |               |               |
| Citrate synthase       | 220.7 +/- 31.2   | 76.7 +/- 5.3 | 186.3 +/- 40.4         | NM             | 117.4 +/- 51.5  |               |               |
| Phosphofructokinase    | 26.0 +/- 3.1     | 29.1 +/- 6.0 | NM                     | 33.4 +/- 1.8   | 18.9 +/- 3.3    |               |               |

**Enzyme activity measurement was described in Experimental procedure. Activity is expressed in nmol/min/mg protein except for glutamine synthase for which the activity is expressed as relative units per mg protein. NM indicates not measured.**

**SI Table 8. Nucleotide sequences of primers and probes used for *M. tuberculosis* mRNA measurement by real-time RT-PCR.**

| <b>Gene</b>                       | <b>RT primers</b>           | <b>PCR primers</b>                                | <b>Molecular beacons</b>               |
|-----------------------------------|-----------------------------|---------------------------------------------------|----------------------------------------|
| <i>ppgK</i><br>( <i>rv2702</i> )  | GCGGCATCAGCGTCGTTGA         | GACCTATCCCGGCGTCTCACTC<br>CGCGTGCGTTGGTCCCTATCC   | TGGGGCTCCGGACCGCGGCTAACGCCCA           |
| <i>pfkA</i><br>( <i>rv3010c</i> ) | TGCGGCACCAGTTTGAGTT         | CGGGGACTCGCATTTCATC<br>CTGCGCCGCTACACCTGT         | ACCGGCGGGGACGATCATGCTGCGCGAGGCCGGT     |
| <i>pfkB</i><br>( <i>rv2029c</i> ) | ACGATCGGGTGCCAAACGTA        | CGAGCGTGCGGGAAct<br>CTGAGATCCAAGCGAGACCA          | ACGCGCCAActGGCCGCGCACACGAAGCGCGT       |
| <i>gap</i><br>( <i>rv1436</i> )   | TGGCCGCATTGGTGAACAG         | GCGCATCTGCTCAAATTCGACT<br>CGCGAGCGCCTTGATTTT      | ACCGCGACACCATCGTCGTCGGCCGCGCGCGGT      |
| <i>pykA</i><br>( <i>rv1617</i> )  | GAGGCTACCCGGACCCGCTCAT<br>A | CGCGGGAAAATCGTCTGCACTCT<br>AGTTCATTGGGCGACGTCCATT | ACCGCGTCAGAGCGCTGGTCGAGGCCGCGGT        |
| <i>lpdC</i><br>( <i>rv0462</i> )  | CAACACCTTTTCCGCCTTAAGC      | CACTGTGGCCAACGTAGTCAC<br>CACCAGCTCCGGCAATAATGA    | CGTGCGAACAGATCCTGTCCCGAGAGCGCAGC       |
| <i>dlaT</i><br>( <i>rv2215</i> )  | TCGGTGTCGACAGCGAATCCTA      | ACCTGACCTTCCTGCCGTTCTTC<br>GTGCTCGGCGTCGTAGTAGGTG | CCCAGGCGAACATCAACGCTAGCTACAACGAGCCTGGG |
| <i>devB</i><br>( <i>rv1445c</i> ) | TGCGGGAACAGCGAGTTA ATG      | AGACGATGACGAGCGCAATCT<br>CGGCCAGCACCTGTTCGTAG     | TGCGCGATTCCATCGAACCAGGTGCACCCCGCGCA    |
| <i>zwf1</i><br>( <i>rv1121</i> )  | GCCACGTCTGCTCGATGCTG        | CCCAACCAGATTGTGCTGCGTAT<br>GAGGTCCACCGCGAACGA     | CGCGCTGATCCGGGTATGCGACTGCAGAGCGCG      |
| <i>zwf2</i><br>( <i>rv1447c</i> ) | GGCCGAGAGCACCTTGATCTT       | CTTCCGCATCGACCACTACCT<br>GGCCATGGTGATCTGTACGTG    | AGGCCCAGAACATCCTGGCGCTGCGGGGCCCT       |
| <i>tkt</i><br>( <i>rv1449c</i> )  | GTGTCCTCACACAGCGCGATGTT     | GAAGAAGGGGTGACCTCGGA<br>GATCTGGTTGCGGTCGTAGAACA   | AGGCGGCCGCGGTCCAGCAACTCCGCCT           |

**SI Table 8 (continued)**

| <b>Gene</b>              | <b>RT primers</b>      | <b>PCR primers</b>                                | <b>Molecular beacons</b>              |
|--------------------------|------------------------|---------------------------------------------------|---------------------------------------|
| <i>citA</i><br>(rv0889c) | CCCAGTTGAGGCGATCACACG  | TCCGCACGGGGCATCTA<br>CGACACCCAGTAGGCGTCAAT        | ACGGGCGAGCCAGACCCCAGACACATCGAGGCCCGT  |
| <i>gltA2</i><br>(rv0896) | CCACGCTCAGTGAGTTATCTGG | GTTGTCCAGCGTGGTCAATGC<br>CGTACGCGGCATGGTG         | ACCGCGTGCTCTGGACCCCATGGACAACGGACGCGGT |
| <i>acn</i><br>(rv1475c)  | CGTTGTCGTTAACCGCTTTTGA | TCCAACCCCGAAGTAATGCT<br>AGGCCGGATCTGTCTAGTAGT     | ACCGGGTGGACTGACCTCGAAGCCGTGGGACCCGGT  |
| <i>icd1</i><br>(rv3339c) | CAGTCGCGGCACATTAGAAAT  | CTCGACATCCGCTTGGACTATT<br>GTGATCGTCGCGCACTTTA     | CCGGGTGAGCACCGCGACGCCACCGACGACACCCGG  |
| <i>icd2</i><br>(rv0066c) | GAGTTTGGCCCGCTCGTTAC   | GCGACTACCTCACCGACCTGT<br>CCGCCCCCGTCTCGTAC        | AGGCGCTGTCCGTCGTTCCGCTGATGCGCCT       |
| <i>kgd</i><br>(rv1248c)  | GCGGCCAGCTCGTAATACAG   | TTCACGCCCAAGTCGATGTT<br>CCGATGCCGTCCTCATAGGT      | AGCGCGCTTCACCGAGATCAAGTTCCGCCGCGCT    |
| <i>sdhA</i><br>(rv3318)  | AGGTCGGTGTTGAAGCGTTTCC | GTTATGCGCAGGGTCACGACTTT<br>CGGCGTTGTTGTCCATCGACT  | CCGGGGGGGTCAGCGACATCCTGTCCGAACCCCGG   |
| <i>sdhC</i><br>(rv3316)  | CCACGCCTGCCGGAACCATC   | CGGTGCTGGCGACCTACAAGAC<br>CAAGATGACCCGAATCCCGTTCA | ACGGGCCCTAGTCGCCGCGGTCCTTTTGCCCGT     |
| <i>mdh</i><br>(rv1240)   | CCAGGCTCACACCATCGAAG   | TAGTCCTCTCAAGGTCGCCGTTA<br>GCAGTCGTCGAGTTCATCA    | CGGGTCCCCTGACCGTCCGATCGAGCTGGACCCG    |
| <i>icl</i><br>(rv0467)   | GGCCCTCTTCGGTGGAAC     | GGCCCTCTTCGGTGGAAC<br>CCAGAACCAGATGAGCGCGTAT      | ACGCCCGGGGCTACACCGCGACCAAGGGCGT       |
| <i>glcB</i><br>(rv1837c) | GATGCACGCCTTGAGGTTGAC  | TGGCGTTTACCTGCGAACTGT<br>GATGCACGCCTTGAGGTTGAC    | CGCGCGATGAAGATCGGCATCATGGACGAGCGCGG   |
| <i>prpC</i><br>(rv1131)  | CGTCCTCGTCCGGGTCC      | ATTCGTTGACCTACCGGGGATA<br>CAG CAT CGA GCG GTC CAC | TGCGCGGTTTCGAGCAGGTCGCCTTCCTCGCGCA    |

**SI Table 8 (continued)**

| <b>Gene</b>               | <b>RT primers</b>       | <b>PCR primers</b>                               | <b>Molecular beacons</b>                        |
|---------------------------|-------------------------|--------------------------------------------------|-------------------------------------------------|
| <i>mez</i><br>(rv2332)    | CCGGGCACCAGCGACAAT      | AGATCGCATCGCCCACTATCCT<br>AGCGGAAAGATCATCGGGTGT  | TGCGCGAAAGAGGTGGTTCGAGGCGATGACGCGCGCA           |
| <i>pckA</i><br>(rv0211)   | CATGCAACCCCGGTACAGGTCT  | AGCGGCTCTGCGATCAGCTAGT<br>CGCCGAGCAGATGTACGTCC   | CGCTGCC CCG AGAAGCACAA GAACTCCTAC CT<br>GGCAGCG |
| <i>pca</i><br>(rv2967c)   | GAAGAACTGGTTGGCCGACAAT  | GTTGGGCAGGCTGGTTAAGGTC<br>CCGCAGAAATCCGAGTACCGA  | CCGCCGACGAATTCGCCTCCGATCCAGCCGGCGG              |
| <i>glpX</i><br>(rv1099c)  | GGTGAAGTCGATCGCGGAGTATT | TCTGGTGTCCGGGAAAACGTCT<br>TGCAGCCGCCGGGTAGTAAC   | CCGACC CTTC TGCGCCACTG GGGTCACCG GGTCGG         |
| <i>fadE5</i><br>(rv0244c) | GGAGCCCACACCCTTGACTACC  | TGCGTGCCTCTACCTCTACAC<br>GTTGACCTTGACGGCCAACTT   | CGGGCTCTGTCCCGAGGTGGTGCAAGCCCG                  |
| <i>fadE23</i><br>(rv3140) | TTTCCGGGTTCCCAAGTAGGTT  | GCCGATAGCCCGCAAGTACGAC<br>GGCTCCGGCAAAGTTGAACGAT | ACGCGCCCGGTGCAACTCGACACCCTGATCGCGCG             |
| <i>fadA4</i><br>(rv1323)  | CTCTGGCCCGAATGAGTTGA    | GCTGGCGCGCGTACA<br>CCTGGCCCATGATCACGTAC          | ACCGGGTGGCAAGTTGATGGGCTCCCTGAAGACCCGGT          |
| <i>fadB</i><br>(rv0860)   | ATGGCCAAGGTGTAGTCGAACA  | GCTACTTCGCGTCGTTGGTCAC<br>GCACCCAGCACACCGATCC    | AGCGCCGACCTGCAGGCCATCAATGCCGGGCGCT              |
| <i>glfB</i><br>(rv3859c)  | CGGTGCAGTTGGTCAGGTAATG  | GCTGGCCATCGCAATGAA<br>GGGCGGAGGCTACCTGCTTAAT     | ACGGGGCGAGGACGTCAAGCGATTTGACCCCGT               |
| <i>gdh</i><br>(rv2476c)   | GACTCGGCCTTGATGTAAGTGC  | GGTGTACAGCCGCGAACAGA<br>GCAGAATCGCCGAATAAGGTT    | ACCGGTCCCTCGGCATCGACGGCTCAGTTGACCGGT            |
| <i>glnA1</i><br>(rv2220)  | GTTGACCGGCTCGATCTCGTTTT | TGGCAGGCCTGGACGGTATC<br>CGGCGGCAGCTCGTAGAGA      | CGCGCTAAGATCGAGCCGCAGGCGCCAGCGCG                |

**SI Table 8 (continued)**

| <b>Gene</b>               | <b>RT primers</b>              | <b>PCR primers</b>                                    | <b>Molecular beacons</b>             |
|---------------------------|--------------------------------|-------------------------------------------------------|--------------------------------------|
| <i>fas</i><br>(rv2524c)   | AGCAACTCACCGACGGGTTTCAT        | GACACTCAGGGCACCGACCAAT<br>TGCGCTGTTGTCGATCTCGTG       | TGCGCGTCCAGCCGCAGTCAGCTCGGTGCCCGCGCA |
| <i>fabH</i><br>(rv0533c)  | CGGTTCGTCAGTAATTCGGCCATC       | CATACGGCAGGACATCGACTGGA<br>GAA CGC TGC CCA ACG GAA GA | AGGCGCTCAAAATCCCAGCGGCCACGCCAGCGCCT  |
| <i>kasA</i><br>(rv2245)   | GCCCCGATTCATCAGGTCGTAG         | CAAGTTGCTGGGCGGACAG<br>TCCTCTCGGCTCCACCTAGACC         | ACCCGCGTCGATCCAGACCGTTTCGCCGTTGCGGGT |
| <i>fabG1</i><br>(rv1483)  | CCACATTCGCGGTCACGTT            | CCGTCACCCACCGTGGAT<br>AGCACCTCGACCGGACCCT             | ACCCCGCCGTCGATCGCGCCTTCACGGGGT       |
| <i>accD5</i><br>(rv3280)  | TGATCAACGAGATTTGCGGGATG        | TGGCGAGGTGTACGGCGAGAA<br>GGCCAGGATGTTGTTGCGAAAGA      | AGCGCGAAGACCGGCCGTCCGCTCATCCGCGCT    |
| <i>mas</i><br>(rv2940c)   | GTCCCGGTTCCCATGCGTAG           | GCGCCTGGTGTGTCGTAACCTT<br>CAGCAGAGCGGTGATGTCGTA       | CGCGCTGCCGAAGATGACTGCCCGCCGAGCGCG    |
| <i>fadD26</i><br>(rv2930) | TGGTCTCCGGGTTGACGAT            | GGGCCTGATTCTCGGAATTT<br>GCACGGCCAGCTCGAAG             | CGCGACATTTTTGCGCCGTCCGGCCCGTCGCG     |
| <i>fadD28</i><br>(rv2941) | CCCAGTCTAGCCATCGCGTCCT         | CGACGAGAGTGAGCGCACGTT<br>CCTGAGTCGCCGTTCTTAGCC        | CCGCGTACCCTTCGCCGGGCACACCCACGCGG     |
| <i>papA5</i><br>(rv2939)  | GCCCGATCTCAGCGAGGTAAGA         | ATGAGATCCCTGCCACCGAGAC<br>GAACGCCATGAGGTCCGATGT       | ACCGGCTCGCGCATCCTGGGCTGCCCGCCGGT     |
| <i>pks2</i><br>(rv3825c)  | GTC GGC GTG CTG CTG TAT<br>CCA | GCGGGCGGCAGTGTGCTCT<br>CGAGGAAGCGGACAGCGTGAA          | ACCGCGACCGAAGCCCAGCCCCACGCGCGGGT     |
| <i>plsC</i><br>(rv2483c)  | TCTTTGTAGCCGCTTCGTC            | ATCTTCAACCACCGCAACCAG<br>CGGGTCGCTCGCCAGT             | ACCGCCGCGACAACCTGGGTTGGGGTGGGCGGT    |



**SI Table 8 (continued)**

| <b>Gene</b>                       | <b>RT primers</b>     | <b>PCR primers</b>                               | <b>Molecular beacons</b>            |
|-----------------------------------|-----------------------|--------------------------------------------------|-------------------------------------|
| <i>rv2182c</i>                    | ACGTACTCCTGACCCGAGAGC | CCATCGACCGCACCAATG<br>CCTTTGTAGAGCCGACCGTCC      | AGCGGCACGGCAGTGGTGTGCTGGGTCAGGCCGCT |
| <i>tgs1</i><br>( <i>rv3130c</i> ) | AGGGACCTTTGCTGCGCTGTA | GCTAGCTGGGCTCTCCGATGAA<br>AACGCCTCGCTTGGATTGACA  | AGGCCCGCAAGCAACATCCACACGACCATGGGCCT |
| <i>rv3734c</i>                    | CAAACCGGCCGTCGTTCCAGC | TCCAGCCCATGTTCCGAAAGCA<br>CCGAGCGGCGAACGTGGTAATC | AGCGCCCCGTGTGGCATGGGCTTATGACGGCGCT  |
| <i>rv3371</i>                     | GCGCCACACCCAGTTCGATA  | CATCCCGCCACCGCACT<br>CGGCGTCATAGTCAGCGGTGA       | AGCCGGGGATCGCGGTCCTCAGCTACGGCCGCT   |

Nucleotide sequences were obtained from <http://genolist.pasteur.fr/TubercuList/>. RT and PCR primers (shown in the 5' to 3' direction, one primer per line) were designed by using the software Oligo 6.6 (Molecular Biology Insights, Cascade, Colo.) and were purchased from Integrated DNA Technologies (Coralville, Iowa). Molecular beacons, which are hairpin-shaped oligonucleotide probes that become fluorescent upon hybridization to their target sequence (Tyagi & Kramer 1996), were synthesized by Biosearch Technologies (Novato, Calif.). Hairpin stability of molecular beacons was estimated by using the DNA folding program available at <http://www.bioinfo.rpi.edu/zukerm>. Molecular beacons are labeled at 5' with FAM (iodoacetamide derivative of fluorescein (5-iodoacetamidofluorescein)) and at 3' with Dabcyl (4-(4'-dimethylaminophenylazo)-benzoic acid) succinimidyl ester). The nucleotide sequences of primers and molecular beacon for *M. tuberculosis* 16S rRNA were published previously (Shi et al., 2003).

## References

- Shi, L., Y. J. Jung, S. Tyagi, M. L. Gennaro & R. J. North, (2003) Expression of Th1-mediated immunity in mouse lungs induces a *Mycobacterium tuberculosis* transcription pattern characteristic of nonreplicating persistence. *Proceedings of the National Academy of Sciences of the United States of America* **100**: 241-246.
- Tian, J., R. Bryk, S. Shi, H. Erdjument-Bromage, P. Tempst & C. Nathan, (2005) *Mycobacterium tuberculosis* appears to lack alpha-ketoglutarate dehydrogenase and encodes pyruvate dehydrogenase in widely separated genes. *Molecular microbiology* **57**: 859-868.
- Tyagi, S. & F. R. Kramer, (1996) Molecular beacons: probes that fluoresce upon hybridization. *Nature biotechnology* **14**: 303-308.
